WITHDRAWN ARTICLE

## WITHDRAWN: Performance of cartilage cells in different types of mandibular condylar fractures

*Zhitao Yao, Wei An, Tuerdi Maimaitixun*

*Bioscience Reports* (2020) BSR20193919; **DOI:** 10.1042/BSR20193919

The Accepted Manuscript version of this article (published on 10 June 2020) was withdrawn on 2 July 2020 due to concerns over data validity.
